# Supplementary material for: Immune Checkpoint Inhibitors Combined with Targeted Therapy: The Recent Advances and Future Potentials
Source: MDPI journal article supplement (doi:10.3390/cancers15102858), 2023-05-22
Supplement: s1 [file s1]

**Supplement Table S1. Ongoing Clinical Trials of Combining ICIs and Targeted Drugs**

| Disease                                   | Phase | ICIs          | Combined drugs                                                                                                         | Name /No.                   | Status                 |
|-------------------------------------------|-------|---------------|------------------------------------------------------------------------------------------------------------------------|-----------------------------|------------------------|
| <b>Angiogenesis inhibitors</b>            |       |               |                                                                                                                        |                             |                        |
| Early HCC                                 | III   | Atezolizumab  | Bevacizumab<br>vs. Active surveillance                                                                                 | IMbrave050                  | Recruiting             |
| Advanced NSCLC                            | II    | Avelumab      | Axitinib                                                                                                               | NCT03472560                 | Active, not recruiting |
| Stage III/IV unresectable melanoma        | II    | Ipilimumab    | Bevacizumab                                                                                                            | NCT01950390                 | Active, not recruiting |
| <b>EGFR/HER2 inhibitors</b>               |       |               |                                                                                                                        |                             |                        |
| Recurrent or metastatic HNSCC             | II    | Pembrolizumab | Afatinib                                                                                                               | ALPHA                       | Active, not recruiting |
| Recurrent or metastatic HNSCC             | II    | Pembrolizumab | Cetuximab                                                                                                              | NCT03082534                 | Active, not recruiting |
| <b>PARP inhibitors</b>                    |       |               |                                                                                                                        |                             |                        |
| Stage III/IV non-mucinous EOC             | III   | Dostarlimab   | Niraparib+SOC<br>vs. SOC(Carboplatin+Paclitaxel+Bevacizumab)                                                           | NCT03602859                 | Active, not recruiting |
| Advanced OC                               | III   | Avelumab      | Talazoparib+Paclitaxel+Carboplatin<br>vs. Bevacizumab+Paclitaxel+Carboplatin and<br>Talazoparib+Paclitaxel+Carboplatin | JAVELIN OVARIAN PARP<br>100 | Active, not recruiting |
| BRCA1/2-deficient OC                      | I/II  | Tremelimumab  | Olaparib                                                                                                               | NCT02571725                 | Active, not recruiting |
| <b>MAPK/ERK signaling inhibitors</b>      |       |               |                                                                                                                        |                             |                        |
| Metastatic, recurrent or refractory NSCLC | II    | Atezolizumab  | Cobimetinib                                                                                                            | NCT03600701                 | Recruiting             |
| MSS metastatic colon                      | II    | Durvalumab    | Trametinib                                                                                                             | NCT03428126                 | Recruiting             |

cancer

|                                                   |                           |      |               |                                                             |             |                        |
|---------------------------------------------------|---------------------------|------|---------------|-------------------------------------------------------------|-------------|------------------------|
| Metastatic refractory mutant TC                   | radioiodine $BRAF^{V600}$ | II   | Nivolumab     | Encorafenib+Binimetinib vs. Encorafenib+Binimetinib         | NCT04061980 | Recruiting             |
| Advanced TNBC                                     | or metastatic             | I/II | Pembrolizumab | Binimetinib                                                 | NCT03106415 | Recruiting             |
| Advanced NSCLC                                    |                           | I    | Pembrolizumab | Binimetinib                                                 | NCT03991819 | Recruiting             |
| <b>CDK inhibitors</b>                             |                           |      |               |                                                             |             |                        |
| ER+ mBC                                           |                           | II   | Avelumab      | Palbocicli+Endocrine therapy vs. Avelumab+Endocrine therapy | ImmunoADAPT | Recruiting             |
| NSCLC                                             |                           | I    | Pembrolizumab | Abemaciclib                                                 | NCT02779751 | Active, not recruiting |
| <b>PI3K/AKT/mTOR signaling pathway inhibitors</b> |                           |      |               |                                                             |             |                        |
| Advanced UC                                       |                           | II   | Nivolumab     | Eganelisib vs. Nivolumab                                    | MARIO-275   | Active, not recruiting |
| Metastatic melanoma                               |                           | I/II | Pembrolizumab | GSK2636771                                                  | NCT03131908 | Active, not recruiting |
| HNSCC                                             |                           | I/II | Nivolumab     | Copanlisib                                                  | NCT03735628 | Active, not recruiting |
| Colon cancer                                      |                           | I/II | Nivolumab     | Copanlisib                                                  | NCT03711058 | Active, not recruiting |
| <b>Hormone receptor inhibitors</b>                |                           |      |               |                                                             |             |                        |
| mCRPC                                             |                           | II   | Nivolumab     | Enzalutamide                                                | NCT03338790 | Active, not recruiting |
| Small cell neuroendocrine PC                      |                           | II   | Cetrelimab    | Apalutamide                                                 | NCT04926181 | Not yet recruiting     |

HR+, HER2- advanced or II Pembrolizumab Fulvestrant  
metastatic BC

NCT03393845

Recruiting

---

HCC: hepatocellular carcinoma; NSCLC: non-small cell lung cancer; HNSCC: head and neck squamous cell carcinoma; OC: ovarian cancer; EOC: epithelial ovarian cancer; TC: thyroid cancer; TNBC: triple-negative breast cancer; BC: breast cancer; mBC: metastatic breast cancer; UC: urothelial carcinoma; mCRPC: metastatic castration-resistant prostate cancer; PC: prostate cancer; MSS: microsatellite stable; ER+: estrogen receptor positive; HR+: hormone receptor positive; HER2-: HER2 negative.
